# Supplementary material
Source: PubMed Central journal article supplement (PMC5028235)
Supplement: NIHMS767560-supplement-01.pdf [file NIHMS767560-supplement-01.pdf]

## **List of Supplemental Digital Content**

**Supplemental Digital Content 1.** Figure that displays the trajectories of estradiol over the menopause transition. PDF

**Supplemental Digital Content 2.** Figure that displays the trajectories of follicle stimulating hormone over the menopause transition. PDF

**Supplemental Digital Content 3.** Table that demonstrates the relative odds of belonging to a VMS trajectory group. PDF
