# Supplementary material
Source: PubMed Central journal article supplement (PMC5028235)
Supplement: NIHMS767560-supplement-Supplemental_Data_File___doc___tif__pdf__etc___1.pdf [file NIHMS767560-supplement-Supplemental_Data_File___doc___tif__pdf__etc___1.pdf]

## Supplemental Digital Content 1

### Trajectory of Estradiol over the Menopause Transition

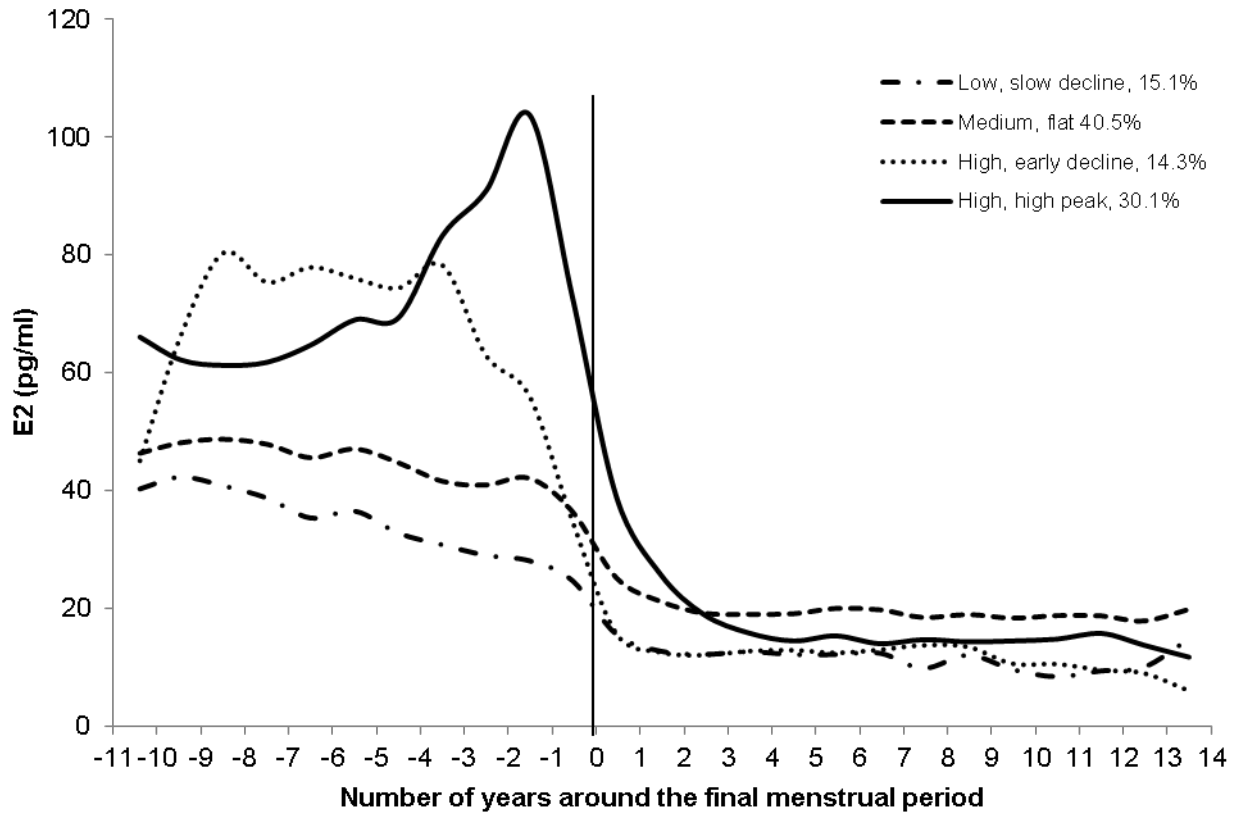

E2 indicates estradiol; the vertical line indicates at the time of final menstrual period.

E2 levels were the average observed serum E2 levels at each time point. Cycle day of blood draw were included as time-varying covariate in the model.
