# Supplementary material
Source: PubMed Central journal article supplement (PMC5028235)
Supplement: NIHMS767560-supplement-Supplemental_Data_File___doc___tif__pdf__etc___2.pdf [file NIHMS767560-supplement-Supplemental_Data_File___doc___tif__pdf__etc___2.pdf]

## Supplemental Digital Content 2

### Trajectory of Follicle Stimulating Hormone over the Menopause Transition

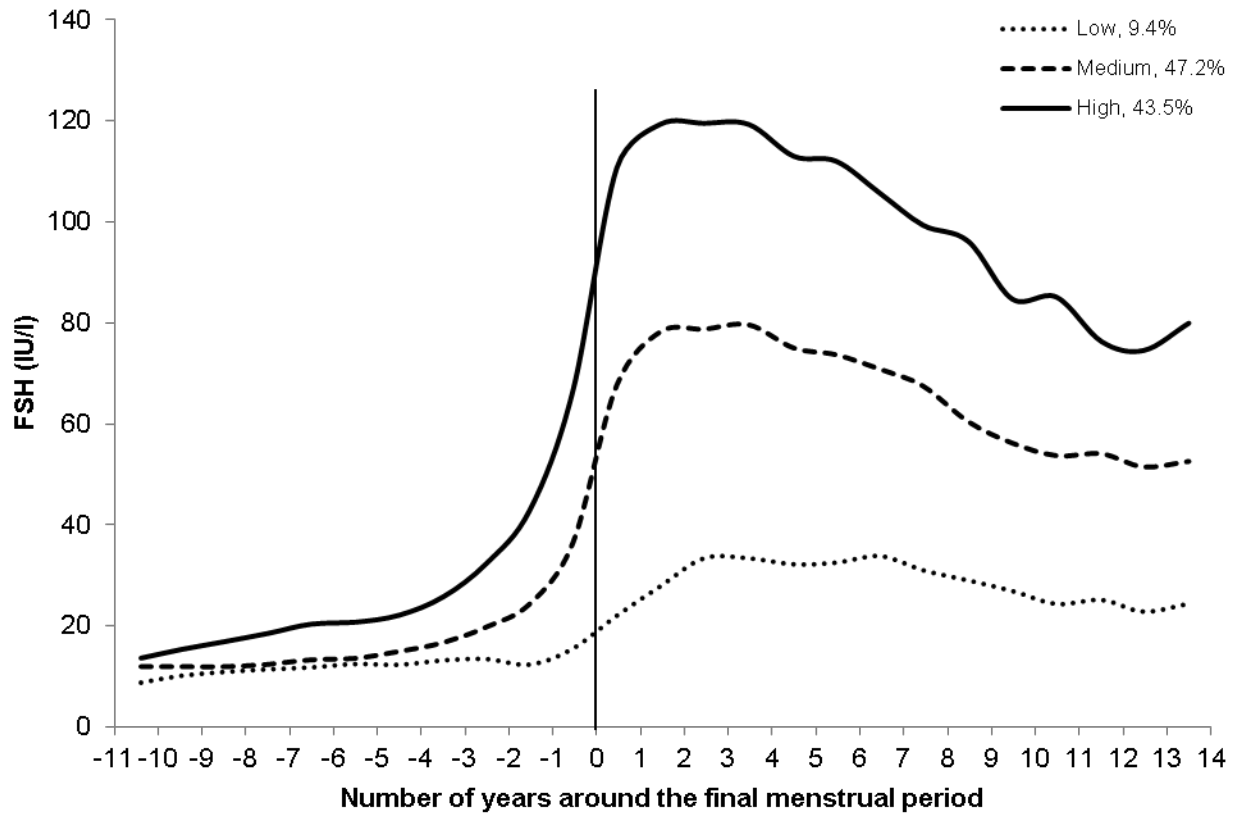

FSH indicates estradiol; the vertical line indicates at the time of final menstrual period.

FSH levels were the average observed serum FSH levels at each time point. Cycle day of blood draw were included as time-varying covariate in the model.
