# Supplementary material
Source: PubMed Central journal article supplement (PMC5028235)
Supplement: NIHMS767560-supplement-Supplemental_Data_File___doc___tif__pdf__etc___3.pdf [file NIHMS767560-supplement-Supplemental_Data_File___doc___tif__pdf__etc___3.pdf]

### Supplemental Digital Content 3.

#### Adjusted Odds Ratios of Belonging to a VMS Trajectory Relative to a Low VMS Trajectory<sup>a</sup> (n=1455)

| Risk factors                        | Early onset VMS<br>(n=246) | Late onset VMS<br>(n=422) | High VMS<br>(n=382)      |
|-------------------------------------|----------------------------|---------------------------|--------------------------|
| FSH trajectory                      |                            |                           |                          |
| High                                | 1 [Reference]              | 1 [Reference]             | 1 [Reference]            |
| Medium                              | 0.68 (0.42, 1.10)          | 0.82 (0.58, 1.18)         | <b>0.58 (0.39, 0.84)</b> |
| Low                                 | 1.11 (0.51, 2.38)          | 0.67 (0.32, 1.43)         | 0.66 (0.33,1.30)         |
| Race/Ethnicity                      |                            |                           |                          |
| Non-Hispanic White                  | 1 [Reference]              | 1 [Reference]             | 1 [Reference]            |
| African American                    | 1.02 (0.52, 1.99)          | <b>1.90 (1.12, 3.24)</b>  | <b>3.21 (1.92,5.37)</b>  |
| Chinese                             | 0.70 (0.22,2.27)           | 0.49 (0.21, 1.12)         | 0.43 (0.17, 1.06)        |
| Japanese                            | 0.71 (0.24, 2.05)          | 0.98 (0.44,2.18)          | 0.63 (0.27, 1.43)        |
| Hispanic                            | 0.99 (0.19, 5.30)          | 1.02 (0.29, 3.63)         | 1.83 (0.38, 8.76)        |
| BMI                                 |                            |                           |                          |
| Normal                              | 1 [Reference]              | 1 [Reference]             | 1 [Reference]            |
| Overweight                          | 1.08 (0.56, 2.06)          | 0.84 (0.53, 1.32)         | 1.00 (0.62, 1.62)        |
| Obese                               | 1.42 (0.80, 2.50)          | <b>0.55 (0.35, 0.85)</b>  | 0.75 (0.48, 1.18)        |
| Age at FMP (per yr)                 | <b>1.21 (1.09, 1.33)</b>   | 0.97 (0.91, 1.03)         | 1.04 (0.97, 1.12)        |
| Menopause status                    |                            |                           |                          |
| Premenopause                        | 1 [Reference]              | 1 [Reference]             | 1 [Reference]            |
| Early perimenopause                 | <b>2.11 (1.33, 3.37)</b>   | 1.20 (0.84, 1.71)         | 1.29 (0.90,1.85)         |
| Physical activity score (per point) | 1.01 (0.88, 1.17)          | 0.96 (0.86, 1.06)         | 0.97 (0.87, 1.08)        |
| Smoking status                      |                            |                           |                          |
| Never                               | 1 [Reference]              | 1 [Reference]             | 1 [Reference]            |
| Past                                | 1.35 (0.79, 2.29)          | 1.21 (0.80,1.85)          | 1.22 (0.79, 1.87)        |
| Current                             | 1.99 (0.94,4.23)           | <b>1.82 (1.02, 3.27)</b>  | 1.31 (0.72, 2.40)        |
| Alcohol servings per wk use         |                            |                           |                          |
| None                                | 1 [Reference]              | 1 [Reference]             | 1 [Reference]            |
| ≤1                                  | 1.26 (0.61, 2.57)          | 1.43 (0.81, 2.52)         | 1.12 (0.59, 2.10)        |
| 1-7                                 | 1.20 (0.68, 2.57)          | 1.39 (0.91, 2.11)         | <b>1.75 (1.13, 2.70)</b> |
| >7                                  | 1.96 (0.92, 4.17)          | 1.45 (0.81, 2.62)         | <b>1.93 (1.06, 3.51)</b> |
| General health status               |                            |                           |                          |
| Excellent                           | 1 [Reference]              | 1 [Reference]             | 1 [Reference]            |
| Very good                           | <b>2.32 (1.13, 4.73)</b>   | <b>1.64 (1.06, 2.52)</b>  | <b>1.82 (1.11, 2.98)</b> |
| Good                                | <b>3.59 (1.65, 7.81)</b>   | 1.19 (0.70, 2.03)         | <b>1.86 (1.06, 3.27)</b> |
| Fair/Poor                           | <b>3.10 (1.15, 8.35)</b>   | 0.88 (0.41, 1.91)         | <b>2.36 (1.16, 4.81)</b> |

| <b>Risk factors</b>                                       | <b>Early onset VMS<br/>(n=246)</b> | <b>Late onset VMS<br/>(n=422)</b> | <b>High VMS<br/>(n=382)</b> |
|-----------------------------------------------------------|------------------------------------|-----------------------------------|-----------------------------|
| Difficulty paying for basics                              |                                    |                                   |                             |
| Not hard                                                  | 1 [Reference]                      | 1 [Reference]                     | 1 [Reference]               |
| Very/somewhat hard                                        | 0.87 (0.52, 1.46)                  | 1.00 (0.68, 1.47)                 | 0.92 (0.62, 1.36)           |
| Educational attainment                                    |                                    |                                   |                             |
| ≥College                                                  | 1 [Reference]                      | 1 [Reference]                     | 1 [Reference]               |
| <College                                                  | 1.56 (0.96, 2.52)                  | 1.25 (0.86, 1.82)                 | <b>1.85 (1.27, 2.71)</b>    |
| Depressive symptoms scores on the CES-D Scale (per point) | <b>1.05 (0.96, 2.52)</b>           | 1.02 (1.00, 1.05)                 | <b>1.05 (1.02, 1.08)</b>    |
| Anxiety symptoms score ≥4                                 |                                    |                                   |                             |
| No                                                        | 1 [Reference]                      | 1 [Reference]                     | 1 [Reference]               |
| Yes                                                       | 2.30 (1.22 (4.32)                  | 0.84 (0.45, 1.57)                 | <b>2.46 (1.43, 4.21)</b>    |
| Symptom sensitivity (per point)                           | 1.03 (0.96, 1.10)                  | 1.10 (0.96, 1.06)                 | <b>1.10 (1.05, 1.16)</b>    |
| Hormone use before FMP                                    |                                    |                                   |                             |
| No                                                        | 1 [Reference]                      | 1 [Reference]                     | 1 [Reference]               |
| Yes                                                       | 1.95 (0.98,3.88)                   | 0.97 (0.54, 1.77)                 | 1.57 (0.89, 2.77)           |

CI, confidence interval; VMS, menopausal vasomotor symptoms; BMI, body mass index; CES-D, Center for Epidemiologic Studies-Depression.

<sup>a</sup>FHS trajectory subgroups were included in the model instead of E2 trajectory subgroups. All risk factors as well as study site was adjusted in the model. Bold fonts of OR(95%CI) indicate *P* value<.05
